# Supplementary material for: Activation of Somatostatin-Expressing Neurons in the Lateral Septum Improves Stress-Induced Depressive-like Behaviors in Mice
Source: MDPI journal article supplement (doi:10.3390/pharmaceutics14102253), 2022-10-21
Supplement: s1 [file s1]

# Supplementary Materials: Activation of Somatostatin-Expressing Neurons in the Lateral Septum Improves Stress-Induced Depressive-Like Behaviors in Mice

Huanhuan Li <sup>1,2</sup>, Hyun Hailey Sung <sup>1,2</sup> and Chunyue Geoffrey Lau <sup>1,2,\*</sup>

<sup>1</sup> Department of Neuroscience, City University of Hong Kong, Hong Kong 999077, China

<sup>2</sup> Shenzhen Research Institute, City University of Hong Kong, Shenzhen 518057, China

\* Correspondence: geoff.lau@cityu.edu.hk; Tel.: +852-3442-4345

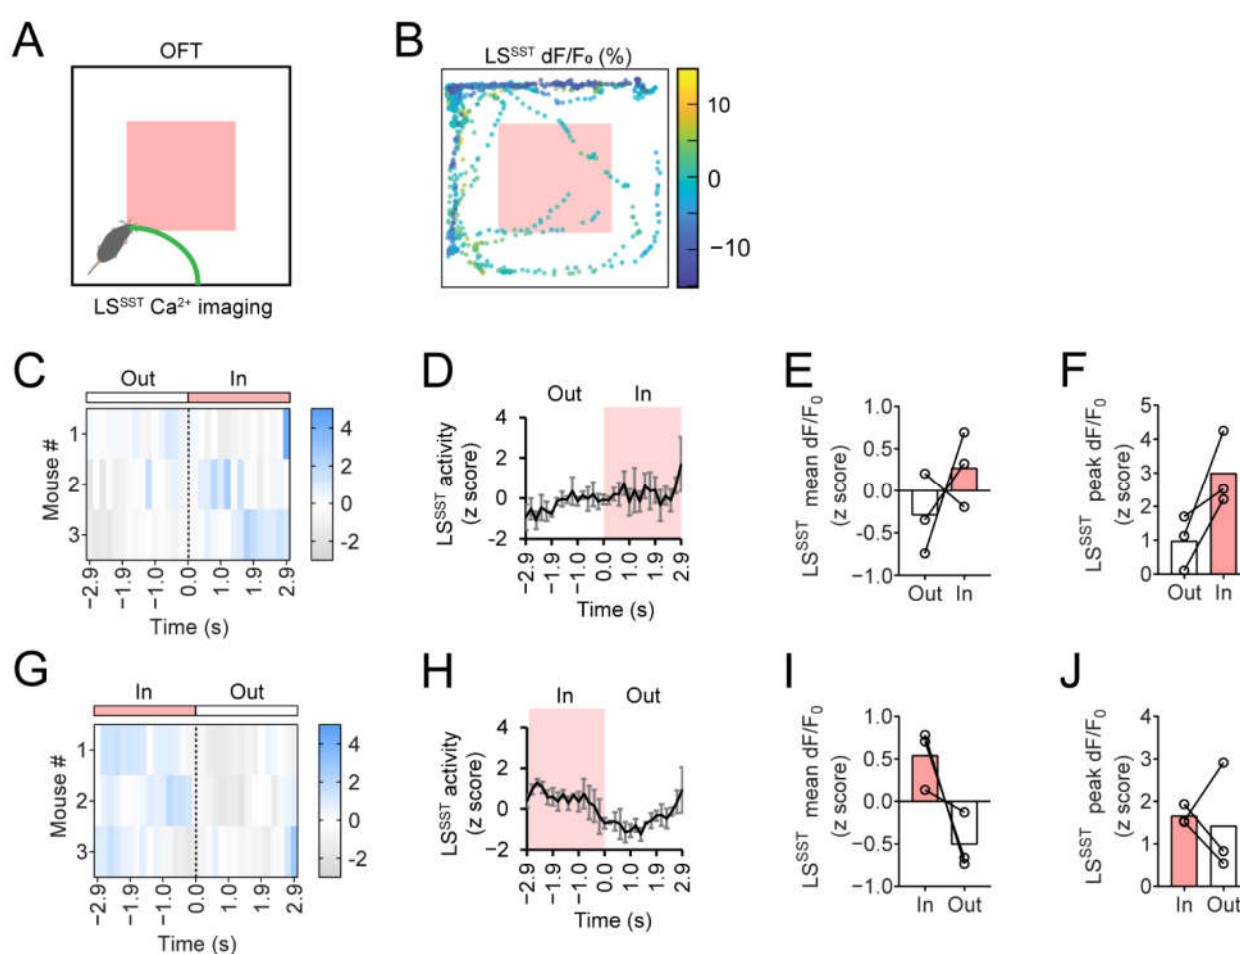

**Figure S1.** LSST neuronal activity does not correlate with thigmotaxis in the OFT. (A) Schematic of calcium recording in the LSST neurons of the G6:SST mice during OFT. The red area indicates center zone. (B) Representative spatial heatmap for the LSST population activity during the OFT. (C) Heatmap of the LSST population activity before and during center entry. The dotted line indicates entry into the center. (D) Averaged LSST activity (z score) during center entries as shown in (C). The red area indicates center entry. The error bars represent s.e.m. (E,F) Average LSST mean (E) and peak activity (F). The filled circle indicates data from each mouse. Student's t-test. (G) Heatmap of the LSST population activity before and after center leave. The dotted line indicates entry into the center. (H) Averaged LSST activity (z score) as shown in (G). The red area indicates center entry. The error bars represent s.e.m. (I,J) Average LSST mean (I) and peak activity (J). The filled circle indicates data from each mouse. Student's t-test. The LSST neurons did not show significant changes related to the anxiety-like behaviors in the OFT.  $n = 3$  mice. Data are mean  $\pm$  s.e.m.

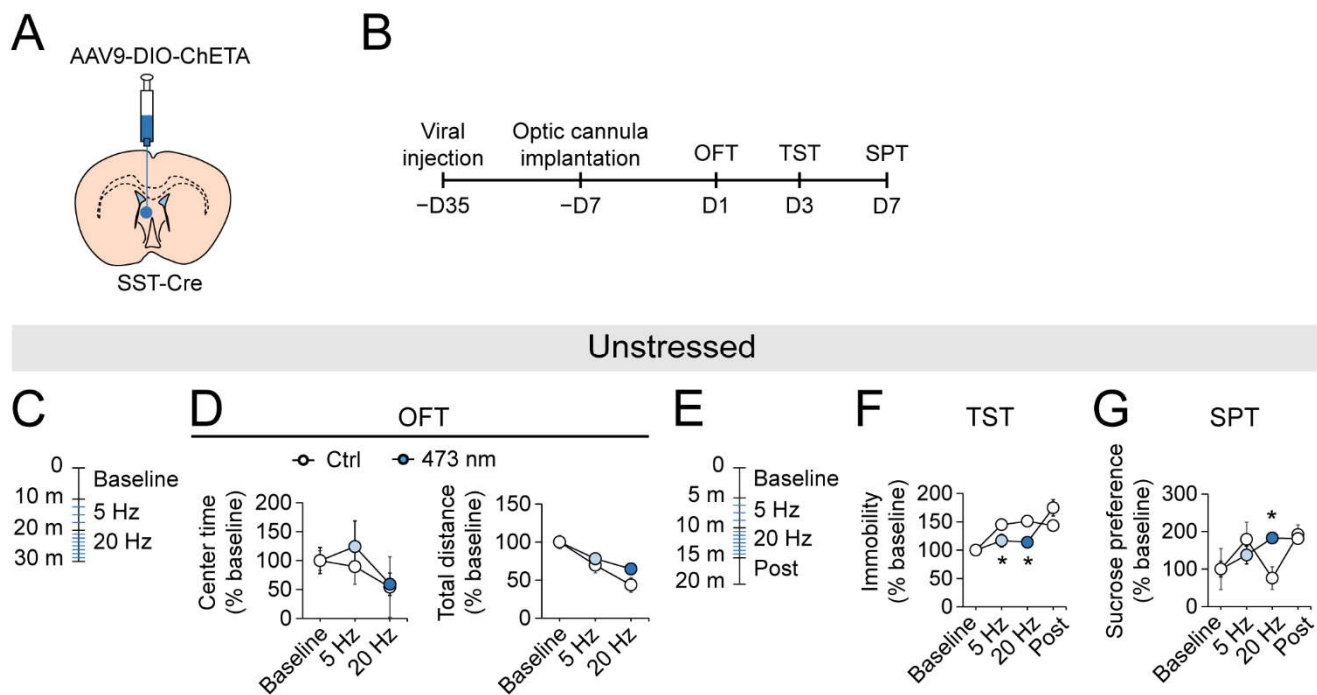

**Figure S2.** Behavioral effects of optogenetic activation of LS<sup>SST</sup> neurons on the depressive-like behaviors of the unstressed mice. **(A)** Schematic of unilateral viral injection of Cre-dependent AAV9-DIO-ChETA into the LS of SST-Cre mice. **(B)** Timeline of viral injection, optic cannula implant, and behavioral testing. **(C)** Schematic of the optogenetic stimulation protocol in the OFT. **(D)** Normalized center time (left) and total distance (right) in the OFT. OFT center time, Mann-Whitney U test; OFT total distance, Two-way repeated measures ANOVA followed by LSD post hoc test. **(E)** Schematic of the optogenetic stimulation protocol in the TST and SPT. **(F)** Normalized immobility time in the TST. Student's t-test. **(G)** Normalized sucrose preference in the SPT. 5 Hz and post, Student's t-test; 20 Hz, Mann-Whitney U test. Ctrl,  $n = 3$  mice; 473 nm,  $n = 10$  mice. Data are mean  $\pm$  s.e.m. \*  $p < 0.05$ .

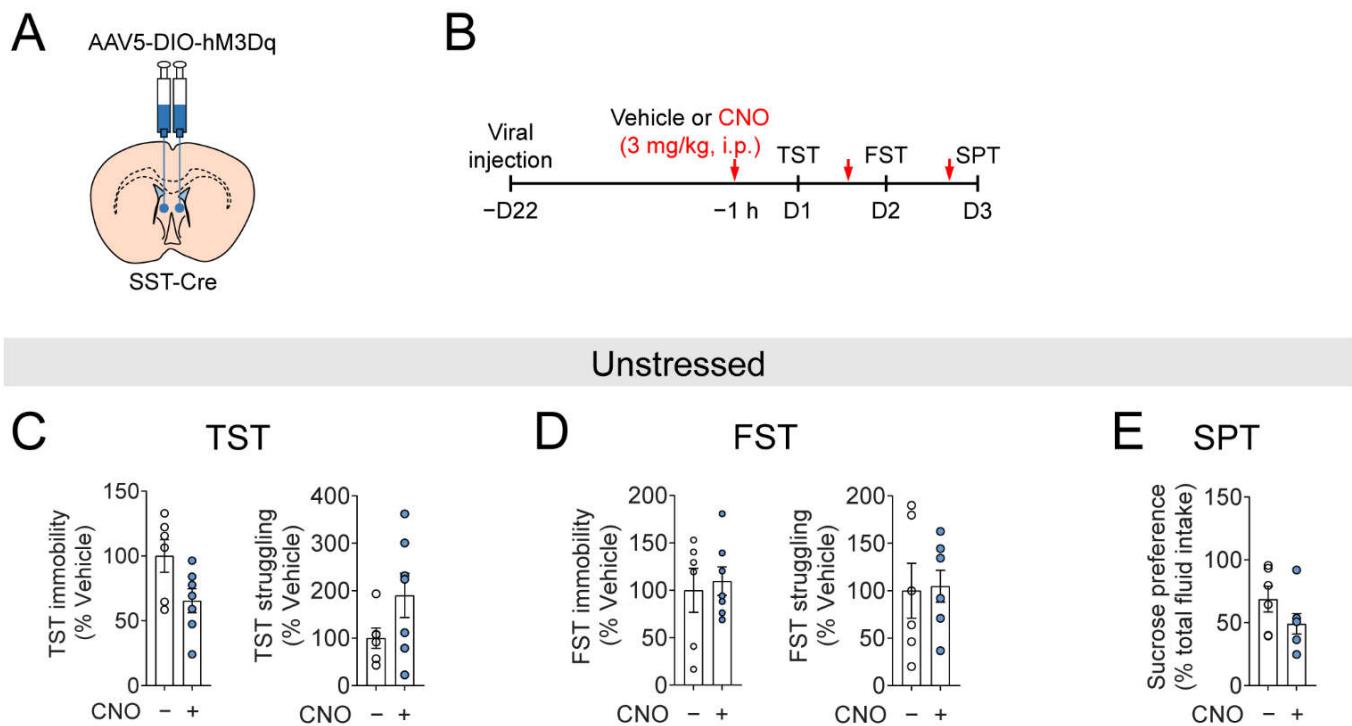

**Figure S3.** Behavioral effects of chemogenetic activation of LS<sup>SST</sup> neurons on the depressive-like behaviors of the unstressed mice. **(A)** Schematic of bilateral viral injection of Cre-dependent AAV5-DIO-hM3Dq into the LS of SST-Cre mice. **(B)** Timeline of viral injection, CNO administration, and behavioral testing. **(C)** Quantification of mouse immobility (left) and struggling (right) time in the TST. Student's *t*-test. **(D)** Quantification of mouse immobility (left) and struggling (right) time in the FST. Student's *t*-test. **(E)** Quantification of mouse sucrose preference in the SPT. Student's *t*-test. Vehicle, *n* = 6 mice; CNO, *n* = 7 mice. Data are mean  $\pm$  s.e.m. The filled circle indicates the value of each mouse.
